# Supplementary figures and images for: Enhanced monocyte chemoattractant protein-1 production in aging mice exaggerates cardiac depression during endotoxemia
Source: Springer Nature journal article supplement (doi:10.1186/s13054-014-0527-8), 2014-09-10

Figure 4

B

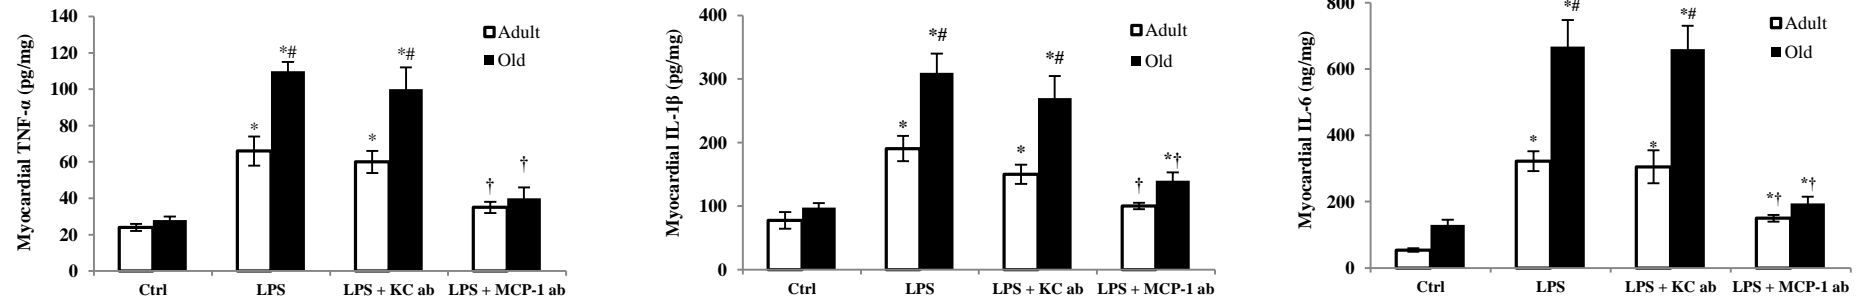

C

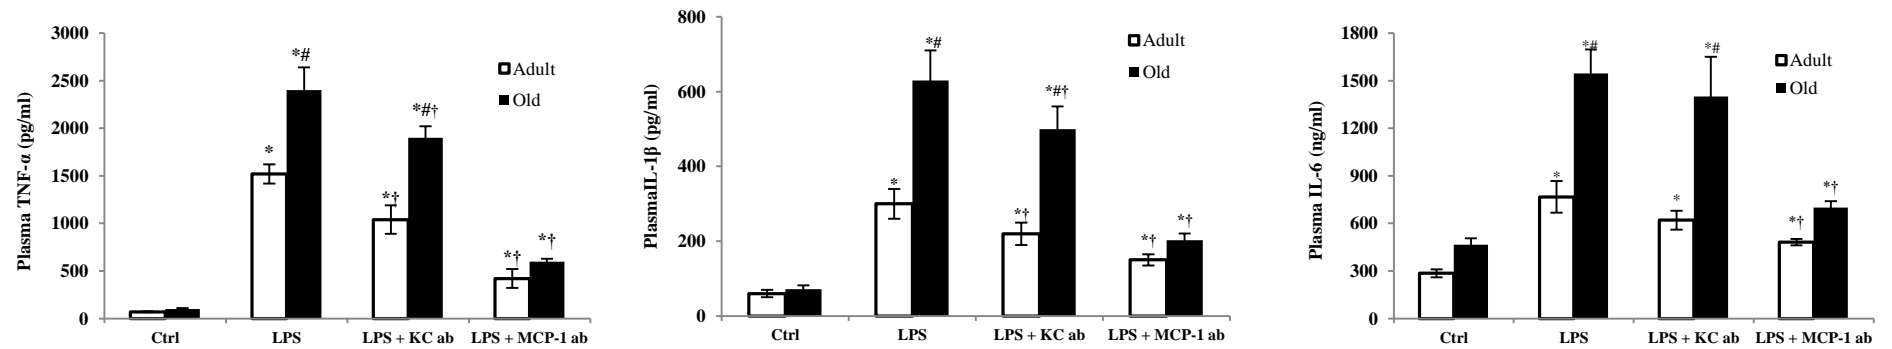

Supplement: MOESM6 [file 9779668]

**Figure 5**

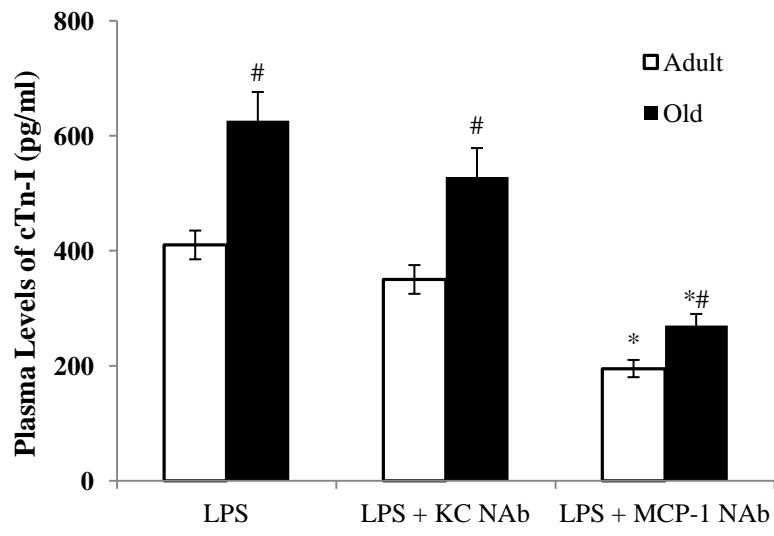

Supplement: MOESM7 [file 9779668]
